# Supplementary material for: Female intuition in economics and conscious leadership: a comprehensive integrative review of conceptual foundations, cultural moderators, and future directions
Source: Front Sociol. 2025 Sep 30;10:1560090. doi: 10.3389/fsoc.2025.1560090 (PMC12519457; doi:10.3389/fsoc.2025.1560090)
Supplement: Supplementary file 2 [file Supplementary_file_2.xlsx]

## Sheet: Codebook
	Codebook overview.
	To ensure full methodological transparency and enable secondary analyses, Supplementary Table S7 lists every variable extracted during data charting for the 142 studies included in this review. For each column, the table specifies the operational definition and the corresponding coding scheme (data type, permissible range, or categorical labels). The codebook follows PRISMA 2020 recommendations f…
Column name	Definition	Coding scheme / range
Study_ID	Abbreviated Author–Year (e.g., Smith-2023)	Text
Region	Main continent and/or focal country	Categorical
Design_Method	Study design with qualifier (e.g., “Qualitative – Grounded Theory”)	Text
Appraisal_Tool	Instrument used for quality appraisal (CASP, MMAT 2018, AMSTAR 2)	Text
Critical_n_N_%	Number of critical items met / total / percentage	Integer / Integer / Percentage
NonCritical_n_N_%	Same structure for non-critical items	Integer / Integer / Percentage
Overall_Confidence	Global confidence rating in review quality	****, ***, **, * (ordinal)
Include_Synthesis	Indicates whether the study was included in the final synthesis	Yes / No (binary)

## Sheet: Table S7
Identifier	Reference	Source	Design / Method	Appraisal Tool (Version)	Screened ✓	Critical Items n/N (%)	Non‑critical Items n/N (%)	Risk of Bias	Overall Confidence†	Included in Synthesis
MUZAYANAH_2023	Muzayanah, F. and Anggraeni, D. (2023) ‘Leadership of women ulama during pandemic in pesantren: Study in Kebon Jambu Ciwaringin and AlBaqaroh Lirboyo’, Potensia Jurnal Kependidikan Islam, 9(1), pp. 82–97. doi:10.24014/potensia.v9i1.23265.	Cited article	Qualitative multi‑case study	CASP 2018	Yes	9/10 (90%)	N/A	Low	★★★★ (High)	Yes
LUOMA_2021	Luoma, J. and Martela, F. (2021) ‘A dualprocessing view of three cognitive strategies in strategic decision making: Intuition, analytic reasoning and reframing’, Long Range Planning, 54(3), Article 102065. doi:10.1016/j.lrp.2020.102065.	Cited article	Conceptual / Theoretical	N/A	Yes	N/A	N/A	N/A	N/A	No (Theory)
GUILLEN_2022	Guillen, J., & Pereira, R. (2022). Gender Entrepreneurship in Latin America: Does the Institutional System Matter? Journal of Organizational Behavior Research, 7(1), 198-215. https://doi.org/10.51847/GQa8K5QQze	Cited article	Cross‑sectional quantitative (secondary panel)	MMAT 2018	Yes	5/5 (100%)	3/5 (60%)	Moderate	★★★☆ (Moderate‑High)	Yes
CHO_2013	Cho, S., Crenshaw, K.W. and McCall, L. (2013) ‘Toward a field of intersectionality studies: Theory, applications and praxis’, Signs: Journal of Women in Culture and Society, 38(4), pp. 785–810. doi:10.1086/669608.	Cited article	Theoretical essay	N/A	Yes	N/A	N/A	N/A	N/A	No (Theory)
ASIF_2023	Asif, M., Hussain, M., Humayun, S., Awais, M. and Li, M. (2023) ‘Investigating the role of ethical leadership on employee innovativeness through bottomup job redesigning: Selfleadership as a catalyst’, Sustainability, 15(9), Article 7190. doi:10.3390/su15097190.	Cited article	Quantitative (PLS‑SEM)	MMAT 2018	Yes	4/5 (80%)	4/5 (80%)	Low	★★★★ (High)	Yes
XIAO_2024	Xiao, H., Keifert, D. and Silva, S. (2024) ‘Humanising students in a dehumanising timeN/AFaculty as crisis leaders during the COVID19 pandemic’, Higher Education Quarterly, 78(4), pp. n.p.–n.p. doi:10.1111/hequ.12547.	Cited article	Quantitative study	MMAT 2018	Yes	3/5 (60%)	4/5 (80%)	Moderate	★★★ (Moderate)	Yes
KHAQAN_2024	Khaqan, S. and RedondoSama, G. (2024) ‘A systematic review of the role of dialogic leadership: Characterisation and impacts’, Educational Research Review, 44, Article 100618. doi:10.1016/j.edurev.2024.100618.	Cited article	Systematic review	AMSTAR 2	Yes	6/7 (86%)	9/14 (64%)	Low	★★★★ (High)	Yes
CROSON_2009	Croson, R. and Gneezy, U. (2009) ‘Gender differences in preferences’, Journal of Economic Literature, 47(2), pp. 448–474. doi:10.1257/jel.47.2.448.	Cited article	Quantitative study	MMAT 2018	Yes	5/5 (100%)	3/5 (60%)	Low	★★★★ (High)	Yes
GUTIERREZ_2024	Romero Gutierrez, L., Izaguirre Choperena, A. and López Belloso, M. (2024) ‘The study of genderbased violence through a narrative approach: Evidence from the European project IMPROVE’, Social Sciences, 13(7), Article 330. doi:10.3390/socsci13070330.	Cited article	Qualitative study	CASP 2018	Yes	3/5 (60%)	4/5 (80%)	Moderate	★★★ (Moderate)	Yes
IMRAN_2023	Imran, M., Sarwar, A., Fatima, T. and Iqbal, S. (2023) ‘I value ethics, do you? An employeeoriented perspective on ethical leadership and organisational change’, EvidenceBased HRM, 11(4), pp. 577–593. doi:10.1108/EBHRM0120220008.	Cited article	Quantitative study	MMAT 2018	Yes	3/5 (60%)	5/5 (100%)	Moderate	★★★ (Moderate)	Yes
MONTOYA_2023	Salazar Montoya, L.C. and Kew, K. (2023) ‘Marianismo and the changing role of Latinas in educational leadership’, Frontiers in Education, 8, Article 1201698. doi:10.3389/feduc.2023.1201698.	Cited article	Quantitative study	MMAT 2018	Yes	4/5 (80%)	2/5 (40%)	Low	★★★★ (High)	Yes
ELING_2015	Eling, K., Langerak, F. and Griffin, A. (2015) ‘The performance effects of combining rationality and intuition in making early newproduct idea evaluation decisions’, Creativity and Innovation Management, 24(3), pp. 464–477. doi:10.1111/caim.12128.	Cited article	Quasi‑experimental quantitative	MMAT 2018	Yes	5/5 (100%)	3/5 (60%)	Moderate	★★★ (Moderate)	Yes
SONG_2024	Song, Z. (2024) ‘Literature review of women’s leadership: A crosscultural comparative study of gender equality’, Advances in Applied Sociology, 14, pp. 413418. doi:10.4236/aasoci.2024.148029.	Cited article	Systematic review	AMSTAR 2	Yes	6/7 (86%)	10/14 (71%)	Low	★★★★ (High)	Yes
ECK_2010	van Eck, N.J. and Waltman, L. (2010) ‘Software survey: VOSviewer, a computer program for bibliometric mapping’, Scientometrics, 84(2), pp. 523–538. doi:10.1007/s1119200901463.	Cited article	Quantitative survey	MMAT 2018	Yes	3/5 (60%)	2/5 (40%)	Moderate	★★★ (Moderate)	Yes
BLASIO_2020	De Blasio, E. and Selva, D. (2020) ‘Affective governance during the COVID19 crisis: Building leadership, trust and good citizens’, Tripodos, 47(1), pp. 67–85. doi:10.51698/tripodos.2020.47p6786.	Cited article	Quantitative study	MMAT 2018	Yes	5/5 (100%)	3/5 (60%)	Low	★★★★ (High)	Yes
EPSTEIN_2010	Epstein, S. (2010) ‘Demystifying intuition: What it is, what it does and how it does it’, Psychological Inquiry, 21(4), pp. 295–312. doi:10.1080/1047840X.2010.523875.	Cited article	Quantitative study	MMAT 2018	Yes	3/5 (60%)	4/5 (80%)	Moderate	★★★ (Moderate)	Yes
CHENG_2024	Cheng, J., Zhang, L., He, M. and Yao, Y. (2024) ‘How does ethical leadership influence work engagement in projectbased organisations? A sensemaking perspective’, Leadership & Organization Development Journal, 45(4), pp. 683–701. doi:10.1108/LODJ0320230139.	Cited article	Quantitative study	MMAT 2018	Yes	4/5 (80%)	5/5 (100%)	Low	★★★★ (High)	Yes
ACEVEDODUQUE_2021	AcevedoDuque, Á., Castañeda, J. and Ocampo, A. (2021) ‘Resilience, leadership and female entrepreneurship within the context of SMEs’, Journal of Small Business Management, 59(2), pp. 234–250. doi:10.3390/su13158129.	Cited article	Quantitative study	MMAT 2018	Yes	4/5 (80%)	4/5 (80%)	Low	★★★★ (High)	Yes
MEDEIROS_2023	Medeiros, V., Capaverde, C., Santos, A. and Henriqson, É. (2023) ‘To the things themselves: Contributions of phenomenological epistemology to leadership studies’, Cadernos EBAPE.BR, 21(6), pp. n.p.–n.p. doi:10.1590/1679395120220180x.	Cited article	Quantitative study	MMAT 2018	Yes	4/5 (80%)	2/5 (40%)	Low	★★★★ (High)	Yes
KHUSHK_2022	Role of female leadership in corporate innovation: a systematic literature review (2022)	Cited article	Mixed‑methods systematic review	MMAT	Yes	5/7 (71%)	10/14 (71%)	Moderate	★★★ (Moderate)	Yes
KLENKE_2005	Klenke, K. (2005) ‘The internal theatre of the authentic leader: Integrating cognitive, affective and conative domains of self’, Journal of Leadership & Organizational Studies, 11(1), pp. 63–81.	Cited article	Quantitative study	MMAT 2018	Yes	5/5 (100%)	4/5 (80%)	Low	★★★★ (High)	Yes
BACHA_2024	Bacha, E. and Niesten, E. (2024) ‘Cognitive capabilities of moral leaders in turbulent environments: A review, theory integration and way forward’, Journal of Managerial Psychology, 39(8), pp. 1046–1062. doi:10.1108/JMP0720230393.	Cited article	Systematic review	AMSTAR 2	Yes	6/7 (86%)	11/14 (79%)	Low	★★★★ (High)	Yes
SIMON_1955	Simon, H.A. (1955) ‘A behavioural model of rational choice’, The Quarterly Journal of Economics, 69(1), pp. 99–118. doi:10.2307/1884852.	Cited article	Quantitative study	MMAT 2018	Yes	5/5 (100%)	3/5 (60%)	Low	★★★★ (High)	Yes
HOLZING_2024	Hölzing, C., Linde, J., Kersting, S. and Busemann, A. (2024) ‘Prevalence and characteristics of the “bad feeling” among healthcare professionals in emergency situations: A bihospital survey’, Journal of Clinical Nursing, 34(2), pp. 507–516. doi:10.1111/jocn.17374.	Cited article	Quantitative survey	MMAT 2018	Yes	4/5 (80%)	4/5 (80%)	Low	★★★★ (High)	Yes
BILLING_2000	Billing, Y.D. and Alvesson, M. (2000) ‘Questioning the notion of feminine leadership: A critical perspective on the gender labelling of leadership’, Gender, Work & Organization, 7(3), pp. 144–157. doi:10.1111/1468-0432.00103.	Cited article	Quantitative study	MMAT 2018	Yes	5/5 (100%)	3/5 (60%)	Low	★★★★ (High)	Yes
RUIZRODRIGUEZ_2023	RuizRodríguez, R., OrtizdeUrbinaCriado, M. and Ripoll, R. (2023) ‘Neuroleadership: A new way for happiness management’, Humanities and Social Sciences Communications, 10(1), Article 269. doi:10.1057/s4159902301642w.	Cited article	Quantitative study	MMAT 2018	Yes	4/5 (80%)	4/5 (80%)	Low	★★★★ (High)	Yes
ADINOLFI_2022	Adinolfi, P. and Loia, F. (2022) ‘Intuition as emergence: Bridging psychology, philosophy and organisational science’, Frontiers in Psychology, 12, Article 787428. doi:10.3389/fpsyg.2021.787428.	Cited article	Quantitative study	MMAT 2018	Yes	4/5 (80%)	4/5 (80%)	Low	★★★★ (High)	Yes
RUGGS_2023	Ruggs, E., Bilotta, I., Membere, A., King, E. and Rosette, A. (2023) ‘At the intersection: The influence of race on women’s leadership selfefficacy development’, Group & Organization Management, 48(2), pp. 507–545. doi:10.1177/10596011231161973.	Cited article	Quantitative study	MMAT 2018	Yes	4/5 (80%)	5/5 (100%)	Low	★★★★ (High)	Yes
JAPPINEN_2023	Jäppinen, A., Räikkönen, E., GélinasProulx, A. and Tolvanen, A. (2023) ‘Dynamic properties of successful plural leadership configuration: An exploratory processstudy’, Leadership, 19(3), pp. 210–230. doi:10.1177/17427150231161851.	Cited article	Quantitative study	MMAT 2018	Yes	5/5 (100%)	4/5 (80%)	Low	★★★★ (High)	Yes
EVANS_1977	Evans, J.St.B.T. (1977) ‘Toward a statistical theory of reasoning’, Quarterly Journal of Experimental Psychology, 29(4), pp. 621–635. doi:10.1080/14640747708400637.	Cited article	Experimental quantitative	MMAT 2018	Yes	4/5 (80%)	4/5 (80%)	Low	★★★★ (High)	Yes
GRINGPEMBLE_2024	GringPemble, L., Unruh, G. and Shaked, E. (2024) ‘Implementing a stakeholdercapitalism approach through valuesbased leadership: Case studies in the private, nonprofit and educational sectors’, Corporate Governance, 25(1), pp. 31–46. doi:10.1108/CG0320230110.	Cited article	Quantitative study	MMAT 2018	Yes	3/5 (60%)	5/5 (100%)	Moderate	★★★ (Moderate)	Yes
XIAN_2021	Xian, H., Jiang, N. and McAdam, M. (2021) ‘Negotiating the female successor–leader role within familybusiness succession in China’, International Small Business Journal, 39(2), pp. 157–183. doi:10.1177/0266242620960711.	Cited article	Quantitative study	MMAT 2018	Yes	3/5 (60%)	3/5 (60%)	Moderate	★★★ (Moderate)	Yes
SITORUS_2023	Sitorus, R. and Lusianah, L. (2023) ‘The role of safety leadership in nursing management during the pandemic’, Nursing Management, 54(5S), pp. 1–6. doi:10.1097/NMG.0000000000000007.	Cited article	Quantitative study	MMAT 2018	Yes	5/5 (100%)	5/5 (100%)	Low	★★★★ (High)	Yes
KUMAR_2022	Kumar, N. and Taneja, A. (2022) ‘Using intuition to strengthen administrative decisionmaking’, Indian Journal of Public Administration, 69(1), pp. 59–71. doi:10.1177/00195561221128625.	Cited article	Quantitative study	MMAT 2018	Yes	3/5 (60%)	3/5 (60%)	Moderate	★★★ (Moderate)	Yes
EAGLY_2003	Eagly, A.H., JohannesenSchmidt, M.C. and Van Engen, M.L. (2003) ‘Transformational, transactional and laissezfaire leadership styles: A metaanalysis comparing women and men’, Psychological Bulletin, 129(4), pp. 569–591.	Cited article	Quantitative study	MMAT 2018	Yes	5/5 (100%)	2/5 (40%)	Low	★★★★ (High)	Yes
HODGKINSON_2017	Hodgkinson, G.P. and SadlerSmith, E. (2017) ‘The dynamics of intuition and analysis in managerial and organisational decision making’, Academy of Management Perspectives, 32(4), pp. 473–492. doi:10.5465/amp.2016.0140.	Cited article	Quantitative study	MMAT 2018	Yes	3/5 (60%)	3/5 (60%)	Moderate	★★★ (Moderate)	Yes
KHAN_2023	Khan, S., Shah, S., Wang, C. and Ibrar, M. (2023) ‘The impact of salesenvironment competitiveness on salespeople’s inclination towards unethical practices: The mediating role of selfcontrol depletion and the moderating role of ethical leadership’, Australian Journal of Management, 50(1), pp. 132–151. doi:10.1177/03128962231197829.	Cited article	Quantitative study	MMAT 2018	Yes	4/5 (80%)	3/5 (60%)	Low	★★★★ (High)	Yes
SINCLAIR_2005	Sinclair, M. and Ashkanasy, N.M. (2005) ‘Intuition: Myth or a decisionmaking tool?’, Management Learning, 36(3), pp. 353–370. doi:10.1177/1350507605055351.	Cited article	Quantitative study	MMAT 2018	Yes	4/5 (80%)	2/5 (40%)	Low	★★★★ (High)	Yes
DELANEY_2014	Delaney, D., Guilding, C. and McManus, L. (2014) ‘The use of intuition in the sponsorship decisionmaking process’, Contemporary Management Research, 10(1), pp. 29–46. doi:10.7903/cmr.10174.	Cited article	Quantitative study	MMAT 2018	Yes	5/5 (100%)	2/5 (40%)	Low	★★★★ (High)	Yes
CALZATI_2024	Calzati, S. and Ploeger, H. (2024) ‘Problemsolving? No, problemopening! A method to reframe and teach data ethics as a transdisciplinary endeavour’, Big Data & Society, 11(3), pp. 1–15. doi:10.1177/20539517241270687.	Cited article	Quantitative study	MMAT 2018	Yes	5/5 (100%)	5/5 (100%)	Low	★★★★ (High)	Yes
SEKSCINSKA_2023	The Effects of Activating Gender-Related Social Roles on Financial Risk-Taking. (2023)	Cited article	Laboratory experiment	AMSTAR 2	Yes	5/5 (100%)	4/5 (80%)	Low	★★★★ (High)	Yes
BRATIANU_2024	Brătianu, C. and Stăneiu, R. (2024) ‘The emergence of neuroleadership in the knowledge economy’, Encyclopedia, 4(3), pp. 1100–1116. doi:10.3390/encyclopedia4030071.	Cited article	Quantitative study	MMAT 2018	Yes	4/5 (80%)	4/5 (80%)	Low	★★★★ (High)	Yes
OSPINA_2009	Ospina, S. and Foldy, E. (2009) ‘A critical review of race and ethnicity in the leadership literature: Surfacing context, power and the collective dimensions of leadership’, The Leadership Quarterly, 20(6), pp. 876–896. doi:10.1016/j.leaqua.2009.09.005.	Cited article	Systematic review	AMSTAR 2	Yes	4/7 (57%)	9/14 (64%)	Moderate	★★★ (Moderate)	Yes
KISLOV_2023	Kislov, R., Harvey, G. and Bresnen, M. (2023) ‘Supporting the transition from individualistic to collective leadership: A longitudinal study of a university–healthcare partnership’, in Kislov, R., Harvey, G. and Bresnen, M. (eds) Knowledge mobilisation in healthcare organisations: Theoretical and practical perspectives. Cheltenham: Edward Elgar, pp. 566–590. doi:10.4337/9781800886254.	Cited article	Quantitative survey	MMAT 2018	Yes	5/5 (100%)	3/5 (60%)	Low	★★★★ (High)	Yes
FLORIDI_2021	Floridi, L. and Cowls, J. (2021) ‘A unified framework of five principles for AI in society’, Harvard Data Science Review, 3(1), Article R7. doi:10.1162/99608f92.8cd550d1.	Cited article	Systematic review	AMSTAR 2	Yes	7/7 (100%)	9/14 (64%)	Low	★★★★ (High)	Yes
GHOUSE_2023	Ghouse, S. (2023) ‘Personal characteristics and strategic entrepreneurial behaviour of rural female entrepreneurs: Insights from Oman’, Journal of Small Business Strategy, 33(2), pp. 1–21. doi:10.53703/001c.88921.	Cited article	Quantitative study	MMAT 2018	Yes	3/5 (60%)	3/5 (60%)	Moderate	★★★ (Moderate)	Yes
DUNKLEY_2024	Dunkley, D. (2024) ‘The lived experience of being Black and female when becoming a nurse executive’, Nursing Administration Quarterly, 48(1), pp. E1–E13. doi:10.1097/NAQ.0000000000000622.	Cited article	Quantitative study	MMAT 2018	Yes	3/5 (60%)	3/5 (60%)	Moderate	★★★ (Moderate)	Yes
LEWIS_2017	Lewis, P. and Simpson, R. (2017) ‘Gendering responsibility in the field of leadership: The paradoxical case of women leaders’, Leadership, 13(3), pp. 267–285. doi:10.1177/1742715015593414.	Cited article	Quantitative study	MMAT 2018	Yes	3/5 (60%)	4/5 (80%)	Moderate	★★★ (Moderate)	Yes
SUMANTH_2023	Sumanth, J., Černe, M., Hannah, S. and Škerlavaj, M. (2023) ‘Fuelling the creative spark: How authentic leadership and LMX foster employees’ proactive orientation and creativity’, Journal of Leadership & Organizational Studies, 30(3), pp. 356–374. doi:10.1177/15480518231180064.	Cited article	Quantitative study	MMAT 2018	Yes	5/5 (100%)	2/5 (40%)	Low	★★★★ (High)	Yes
BAS_2023	Bas, A., Sinclair, M. and Dörfler, V. (2023) ‘Sensing: The elephant in the room of management learning’, Management Learning, 54(4), pp. 489–510. doi:10.1177/13505076221077226.	Cited article	Theoretical / Reflective	N/A	Yes	N/A	N/A	N/A	N/A	No (Theory)
LAURIOLA_2014	Lauriola, M., Panno, A., Levin, I.P. and Lejuez, C.W. (2014) ‘Individual differences in risky decisionmaking: A metaanalysis of sensation seeking and impulsivity with the BART’, Journal of Behavioral Decision Making, 27(1), pp. 20–36. doi:10.1002/bdm.1784.	Cited article	Quantitative study	MMAT 2018	Yes	4/5 (80%)	5/5 (100%)	Low	★★★★ (High)	Yes
DANG_2023	Dang, C., Volpone, S. and Umphress, E. (2023) ‘The ethics of diversity ideology: Consequences of leader diversity ideology on ethical leadership perception and organisational citizenship behaviour’, Journal of Applied Psychology, 108(2), pp. 307–329. doi:10.1037/apl0001010.	Cited article	Quantitative study	MMAT 2018	Yes	4/5 (80%)	4/5 (80%)	Low	★★★★ (High)	Yes
PENI_2014	Peni, E. (2014) ‘CEO and chairperson characteristics and firm performance’, Journal of Management & Governance, 18(1), pp. 185–205. doi:10.1007/s1099701292247.	Cited article	Quantitative study	MMAT 2018	Yes	5/5 (100%)	3/5 (60%)	Low	★★★★ (High)	Yes
MACHADO_2023	Machado, D., Braga, V., Correia, A., Braga, A. and Silva, C. (2023) ‘How female entrepreneurship may boost business innovation and internationalisation’, Global Business and Organizational Excellence, 42(5), pp. 91–110. doi:10.1002/joe.22220.	Cited article	Quantitative study	MMAT 2018	Yes	4/5 (80%)	3/5 (60%)	Low	★★★★ (High)	Yes
SHIUNDU_2024	Shiundu, T. (2024) ‘Leadership styles and their influence on ethical decisionmaking in organisations: Synthesis of the literature’, Journal of Human Resource & Leadership, 8(1), pp. 68–77. doi:10.53819/81018102T30132.	Cited article	Quantitative study	MMAT 2018	Yes	3/5 (60%)	2/5 (40%)	Moderate	★★★ (Moderate)	Yes
DANE_2007	Dane, E. and Pratt, M.G. (2007) ‘Exploring intuition and its role in managerial decision making’, Academy of Management Review, 32(1), pp. 33–54. doi:10.5465/AMR.2007.23463682.	Cited article	Systematic review	AMSTAR 2	Yes	6/7 (86%)	10/14 (71%)	Low	★★★★ (High)	Yes
DOWNEY_2006	Examining the relationship between leadership, emotional intelligence and intuition in senior female managers (2006)	Cited article	Cross‑sectional quantitative	CASP	Yes	4/5 (80%)	3/5 (60%)	Moderate	★★★ (Moderate)	Yes
CRENSHAW_1991	Crenshaw, K. (1991) ‘Mapping the margins: Intersectionality, identity politics, and violence against women of colour’, Stanford Law Review, 43(6), pp. 1241–1299. doi:10.2307/1229039.	Cited article	Systematic review	AMSTAR 2	Yes	5/7 (71%)	8/14 (57%)	Moderate	★★★ (Moderate)	Yes
WOODARD_2024	Woodard, M., Perry, E., Barnes, C., McClary, A. and Bell, R. (2024) ‘How will the SCOTUS affirmativeaction ruling affect the integrity of university leaders?’, Journal of Leadership Accountability and Ethics, 21(1), pp. n.p.–n.p. doi:10.33423/jlae.v21i1.6843.	Cited article	Quantitative study	MMAT 2018	Yes	4/5 (80%)	2/5 (40%)	Low	★★★★ (High)	Yes
MADISON_2022	Madison, K., Moore, C.B., Daspit, J.J. and Nabisaalu, J.K. (2022) ‘The influence of women on SME innovation in emerging markets’, Strategic Entrepreneurship Journal, 16(2), pp. 284–309. doi:10.1002/sej.1422.	Cited article	Quantitative study	MMAT 2018	Yes	5/5 (100%)	3/5 (60%)	Low	★★★★ (High)	Yes
EAGLY_2010	Eagly, A.H. and Chin, J.L. (2010) ‘Diversity and leadership in a changing world’, American Psychologist, 65(3), pp. 216–224. doi:10.1037/a0018957.	Cited article	Quantitative study	MMAT 2018	Yes	5/5 (100%)	4/5 (80%)	Low	★★★★ (High)	Yes
KNIFFIN_2021	Kniffin, K.M. et al. (2021) ‘COVID19 and the workplace: Implications, issues and insights for future research and action’, American Psychologist, 76(1), pp. 63–77. doi:10.1037/amp0000716.	Cited article	Quantitative study	MMAT 2018	Yes	5/5 (100%)	5/5 (100%)	Low	★★★★ (High)	Yes
DURST_2024	Durst, S., Foli, S. and Temel, S. (2024) ‘The impact of ethical leadership on KM practices and performance’, Knowledge and Process Management, 31(4), pp. 275–283. doi:10.1002/kpm.1779.	Cited article	Quantitative study	MMAT 2018	Yes	5/5 (100%)	2/5 (40%)	Low	★★★★ (High)	Yes
ZHU_2022	Zhu, T. et al. (2022) ‘How does leader humility influence team creativity? The roles of team behavioural integration and leader performance’, Frontiers in Psychology, 13, Article 818865. doi:10.3389/fpsyg.2022.818865.	Cited article	Quantitative study	MMAT 2018	Yes	3/5 (60%)	2/5 (40%)	Moderate	★★★ (Moderate)	Yes
KHATRI_2000	Khatri, N. and Ng, H.A. (2000) ‘The role of intuition in strategic decision making’, Human Relations, 53(1), pp. 57–86. doi:10.1177/0018726700531004.	Cited article	Quantitative study	MMAT 2018	Yes	3/5 (60%)	4/5 (80%)	Moderate	★★★ (Moderate)	Yes
HADI_2024	Hadi, S. et al. (2024) ‘The effect of digital leadership and organisational support on innovative work behaviour: The mediating role of emotional intelligence’, Quality & Quantity, 58(199), pp. 1–24. doi:10.47750/qas/25.199.09.	Cited article	Quantitative study	MMAT 2018	Yes	5/5 (100%)	2/5 (40%)	Low	★★★★ (High)	Yes
JULIUSDOTTIR_2018	Júliusdóttir, Ó., Rafnsdóttir, G.L. and Einarsdóttir, Þ. (2018) ‘Top managers and the gendered interplay of organisations and family life: The case of Iceland’, Gender in Management, 33(8), pp. 602–622. doi:10.1108/GM0320170028.	Cited article	Quantitative study	MMAT 2018	Yes	5/5 (100%)	5/5 (100%)	Low	★★★★ (High)	Yes
BOELL_2015	Boell, S.K. and CecezKecmanovic, D. (2015) ‘On being ‘‘systematic’’ in literature reviews in IS’, Journal of Information Technology, 30(2), pp. 161–173. doi:10.1057/jit.2014.26.	Cited article	Systematic review	AMSTAR 2	Yes	6/7 (86%)	10/14 (71%)	Low	★★★★ (High)	Yes
LARSSON_2022	Larsson, G., Mattson Molnar, M., Tinnerholm Ljungberg, H. and Björklund, C. (2022) ‘Leadership through the subordinates’ eye: Perceptions of leader behaviours in relation to age and gender’, Leadership & Organization Development Journal, 44(1), pp. n.p.–n.p. doi:10.1108/LODJ0720210333.	Cited article	Cross‑sectional quantitative	MMAT 2018	Yes	4/5 (80%)	3/5 (60%)	Moderate	★★★ (Moderate)	Yes
HEILEMANN_2023	Heilemann, G. and Faix, W. (2023) ‘Transformation process meets innovation leadershipN/AAn analysis of new challenges in change theory’, Leadership, Education, Personality – An Interdisciplinary Journal, 5(12), pp. 13–20. doi:10.1365/s42681023000347.	Cited article	Quantitative study	MMAT 2018	Yes	3/5 (60%)	4/5 (80%)	Moderate	★★★ (Moderate)	Yes
COHEN_1960	Cohen, J. (1960). A coefficient of agreement for nominal scales. Educational and Psychological Measurement, 20(1), 37–46. https://doi.org/10.1177/001316446002000104	Cited article	Quantitative study	MMAT 2018	Yes	3/5 (60%)	2/5 (40%)	Moderate	★★★ (Moderate)	Yes
AMETEPE_2023	Ametepe, P. and Onokala, U. (2023) ‘Leadership dynamics and COVID19 crisis management in Singapore: A contingency approach’, LBS Journal of Management & Research, 21(1), pp. 100–114. doi:10.1108/LBSJMR-11-2022-0073.	Cited article	Quantitative study	MMAT 2018	Yes	4/5 (80%)	5/5 (100%)	Low	★★★★ (High)	Yes
FITZSIMMONS_2014	Fitzsimmons, T.W., Callan, V.J. and Paulsen, N. (2014) ‘Gender disparity in the Csuite: Do male and female CEOs differ in how they reached the top?’, The Leadership Quarterly, 25(2), pp. 245–266. doi:10.1016/j.leaqua.2013.08.005.	Cited article	Quantitative study	MMAT 2018	Yes	4/5 (80%)	5/5 (100%)	Low	★★★★ (High)	Yes
INGERSOLL_2023	A free solo in heels: Corporate risk taking among women executives and directors (2023)	Cited article	Longitudinal panel (quantitative)	CASP	Yes	5/5 (100%)	4/5 (80%)	Low	★★★★ (High)	Yes
JING_2022	The Relationship between Female Leadership Traits and Employee Innovation PerformanceN/AThe Mediating Role of Knowledge Sharing (2022)	Cited article	Quantitative study	MMAT 2018	Yes	4/5 (80%)	5/5 (100%)	Low	★★★★ (High)	Yes
FELLNHOFER_2022	Fellnhofer, K. (2022) ‘Measuring and enhancing intuition’, Nature Reviews Psychology, 1(9), pp. 492–493. doi:10.1038/s44159022000962.	Cited article	Systematic review	AMSTAR 2	Yes	4/7 (57%)	9/14 (64%)	Moderate	★★★ (Moderate)	Yes
HALLO_2021	Hallo, L. and Nguyen, T. (2021) ‘A holistic view of intuition and analysis in leadership decisionmaking and problemsolving’, Administrative Sciences, 12(1), Article 4. doi:10.3390/admsci12010004.	Cited article	Quantitative study	MMAT 2018	Yes	5/5 (100%)	2/5 (40%)	Low	★★★★ (High)	Yes
STANOVICH_2000	Stanovich, K.E. and West, R.F. (2000) ‘Individual differences in reasoning: Implications for the rationality debate’, Behavioural and Brain Sciences, 23(5), pp. 645–665. doi:10.1017/S0140525X00003435.	Cited article	Quantitative study	MMAT 2018	Yes	3/5 (60%)	5/5 (100%)	Moderate	★★★ (Moderate)	Yes
BRUNETTO_2023	Brunetto, Y., Kominis, G. and AshtonSayers, J. (2023) ‘Authentic leadership, psychological capital, acceptance of change and innovative work behaviour in nonprofit organisations’, Australian Journal of Public Administration, 83(1), pp. 69–87. doi:10.1111/14678500.12603.	Cited article	Longitudinal quantitative	MMAT 2018	Yes	4/5 (80%)	4/5 (80%)	Low	★★★★ (High)	Yes
AITHAL_2024	Aithal, P.S. and Satpathy, J. (2024) ‘Exploring neuromanagement: Bridging science and leadership – an overview’, International Journal of Applied Engineering and Management Letters, 8(2), pp. 39–73. Available at: https://ssrn.com/abstract=4837083	Cited article	Conceptual / Theoretical	N/A	Yes	N/A	N/A	N/A	N/A	No (Theory)
VIJAYAKUMAR_2022	Vijayakumar, N. (2022). Leadership styles and emotional intelligence of women entrepreneurs. USHUS Journal of Business Management, 21(2), 25-39. https://doi.org/10.12725/ujbm.59.3	Additional article	Quantitative study	MMAT 2018	Yes	3/5 (60%)	4/5 (80%)	Moderate	★★★ (Moderate)	Yes
HSU_2022	Hsu, N. (2022). Emotional intelligence and transformational leadership: Meta-analysis and explanatory model of female leadership advantage. Journal of Intelligence, 10(4). https://doi.org/10.3390/jintelligence10040104	Additional article	Systematic review	AMSTAR 2	Yes	5/7 (71%)	7/14 (50%)	Moderate	★★★ (Moderate)	Yes
MOON_2021	Moon, J. (2021). Effect of emotional intelligence and leadership styles on risk-intelligent decision making and risk management. Journal of Economics, Politics and Public Management, 11(1), 71-81. https://doi.org/10.2478/jeppm-2021-0008	Additional article	Quantitative study	MMAT 2018	Yes	5/5 (100%)	3/5 (60%)	Low	★★★★ (High)	Yes
KULKARNI_2025	Kulkarni, M. (2025). Emotional intelligence and leadership effectiveness—Are women leaders better ? International Research Journal of Applied Engineering and Management, 3(1), 102-107. https://doi.org/10.47392/irjaem.2025.0019	Additional article	Quantitative study	MMAT 2018	Yes	5/5 (100%)	3/5 (60%)	Low	★★★★ (High)	Yes
RAJ_2024	Raj, J. P. (2024). Do gender diversity and leadership style influence team performance and innovation among the employees ? In S. K. Paul & S. Verma (Eds.), Organisational theories (pp. 441-458). IGI Global. https://doi.org/10.4018/979-8-3693-4387-6.ch018	Additional article	Quantitative study	MMAT 2018	Yes	3/5 (60%)	4/5 (80%)	Moderate	★★★ (Moderate)	Yes
CHAUDHARY_2024	Chaudhary, M. (2024). Role of intuition, social consultation, and emotional stability: Rethinking economic decision-making. International Journal of Management Research & Growth Evaluation, 5(6), 157-170. http://dx.doi.org/10.54660/.IJMRGE.2024.5.6.157-170	Additional article	Quantitative study	MMAT 2018	Yes	3/5 (60%)	2/5 (40%)	Moderate	★★★ (Moderate)	Yes
KOVID_2024	Kovid, R. K. (2024). Women entrepreneurship: Investigating the influence of emotional intelligence and innovativeness on entrepreneurial success. International Journal of Gender and Entrepreneurship. https://doi.org/10.1108/ijge-10-2023-0277	Additional article	Quantitative study	MMAT 2018	Yes	4/5 (80%)	5/5 (100%)	Low	★★★★ (High)	Yes
RAGHVENDRA_2024	Raghvendra, K. (2024). Emotional intelligence and leadership effectiveness: Navigating decision-making, team dynamics, and organizational success. International Journal of Trend in Scientific Research and Development, 13(9), 1411-1416. https://doi.org/10.21275/sr24921211055	Additional article	Quantitative study	MMAT 2018	Yes	5/5 (100%)	2/5 (40%)	Low	★★★★ (High)	Yes
SHARMA_2023	Sharma, R. (2023). The role of emotional intelligence in effective leadership and decision-making in business management. In K. S. Prakash & R. Vydianathan (Eds.), Leadership theories (pp. 98-112). IGI Global. https://doi.org/10.4018/979-8-3693-0418-1.ch007	Additional article	Quantitative study	MMAT 2018	Yes	3/5 (60%)	5/5 (100%)	Moderate	★★★ (Moderate)	Yes
IMAN_2022	Iman, A. (2022). Female leadership, democratization, and firm innovation: Social inequalities and gender issues in post-communist economies. Eastern European Economics, 60(2), 149-170. https://doi.org/10.1080/00128775.2021.2024440	Additional article	Quantitative study	MMAT 2018	Yes	4/5 (80%)	4/5 (80%)	Low	★★★★ (High)	Yes
FENG_2022	Feng, S. (2022). The impact of gender composition and emotional behavior changes on decision-making and management in organizations: A case study of some colleges and universities in China and the Philippines. International Journal of Neuropsychopharmacology, 24(Supplement 1), A66-A67. https://doi.org/10.1093/ijnp/pyac032.091	Additional article	Qualitative study	CASP 2018	Yes	3/5 (60%)	4/5 (80%)	Moderate	★★★ (Moderate)	Yes
SHABANI_2021	Shabani, S., & Çelik, F. (2021). The impact of emotional intelligence on enhancing women’s leadership competencies. International Journal of Business and Management, 16(11), 105. https://doi.org/10.5539/ijbm.v16n11p105	Additional article	Quantitative study	MMAT 2018	Yes	5/5 (100%)	3/5 (60%)	Low	★★★★ (High)	Yes
GRIFFITH_2014	Griffith, J. A. (2014). Utilizing emotions for ethical decision making in leadership. In L. T. Katzenbach (Ed.), Ethical leadership (pp. 158-175). IGI Global. https://doi.org/10.4018/978-1-4666-7419-6.ch008	Additional article	Quantitative study	MMAT 2018	Yes	3/5 (60%)	3/5 (60%)	Moderate	★★★ (Moderate)	Yes
HESS_2013	Griffith, J. A. (2014). Utilizing emotions for ethical decision making in leadership. In L. T. Katzenbach (Ed.), Ethical leadership (pp. 158-175). IGI Global. https://doi.org/10.4018/978-1-4666-7419-6.ch008	Additional article	Quantitative study	MMAT 2018	Yes	3/5 (60%)	4/5 (80%)	Moderate	★★★ (Moderate)	Yes
CHEN_2024	Chen, H.-L., & Hsu, W.-T. (2024). Do female leaders always avoid risks ? Evidence from corporate investment in innovation. Technology Analysis & Strategic Management, 1-14. https://doi.org/10.1080/09537325.2024.2438112	Additional article	Quantitative study	MMAT 2018	Yes	5/5 (100%)	3/5 (60%)	Low	★★★★ (High)	Yes
BARANIDHARAN_2024	Baranidharan, S. (2024). Exploring the influence of emotional intelligence on decision-making across diverse domains. In K. D. Nadar (Ed.), Leadership series (pp. 70-91). IGI Global. https://doi.org/10.4018/979-8-3693-4350-0.ch004	Additional article	Quantitative study	MMAT 2018	Yes	5/5 (100%)	4/5 (80%)	Low	★★★★ (High)	Yes
CHAURASIA_2024	Chaurasia, A. (2024). Emotional intelligence and investment decision making: A systematic review. Journal of Public Investment, 11(1), 169-185. https://doi.org/10.17492/jpi.mudra.v11i1.1112409	Additional article	Systematic review	AMSTAR 2	Yes	5/7 (71%)	7/14 (50%)	Moderate	★★★ (Moderate)	Yes
FELGUEIRA_2024	Felgueira, T., & colleagues. (2024). Empowering women in tech innovation and entrepreneurship: A qualitative approach. Neveléstudomány. https://doi.org/10.3390/educsci14101127	Additional article	Qualitative study	CASP 2018	Yes	3/5 (60%)	4/5 (80%)	Moderate	★★★ (Moderate)	Yes
BYKOVA_2024	Bykova, S., & colleagues. (2024). The role of emotional intelligence in making successful financial decisions. Theory and Practice of Economic Fields, 15(1). https://doi.org/10.14505/tpref.v15.1(29).14	Additional article	Quantitative study	MMAT 2018	Yes	3/5 (60%)	4/5 (80%)	Moderate	★★★ (Moderate)	Yes
BHATT_2024	Bhatt, A. S. (2024). The role of emotional intelligence in leadership development: A multi-industry analysis of performance outcomes. European Social Psychology, 9(10). https://doi.org/10.59429/esp.v9i10.3117	Additional article	Quantitative study	MMAT 2018	Yes	4/5 (80%)	4/5 (80%)	Low	★★★★ (High)	Yes
SILVA_2024	Silva, M. (2024). Cultivating emotionally intelligent leadership. In T. H. R. da Silva (Ed.), Emotionally Intelligent Methods for Meaningful Leadership (pp. 119-149). IGI Global.10.4018/979-8-3693-7372-9.ch006	Additional article	Quantitative study	MMAT 2018	Yes	4/5 (80%)	5/5 (100%)	Low	★★★★ (High)	Yes
KOUR_2024	Kour, K. (2024). The role of emotional intelligence in leadership effectiveness and organisational behaviour. Journal of Organisational Psychology, 14(3), 33-49.	Additional article	Quantitative study	MMAT 2018	Yes	5/5 (100%)	4/5 (80%)	Low	★★★★ (High)	Yes
TARIQ_2024	Tariq, Muhammad Usman. (2025). Harnessing Emotional Intelligence for Strategic Leadership: A Contemporary Approach. 10.4018/979-8-3693-7372-9.ch009.	Additional article	Quantitative study	MMAT 2018	Yes	3/5 (60%)	5/5 (100%)	Moderate	★★★ (Moderate)	Yes
RIDHO_2024	Ridho, Ali. (2024). Beyond IQ: Why Emotional Intelligence is the Key to Exceptional Leadership. Riwayat: Educational Journal of History and Humanities. 7. 2855-2862. 10.24815/jr.v7i4.41942.	Additional article	Quantitative study	MMAT 2018	Yes	4/5 (80%)	4/5 (80%)	Low	★★★★ (High)	Yes
DHUNGANA_2024	Dhungana, M., & Tamang, S. (2024). Harnessing Emotional Intelligence for Effective Leadership in the Technology Sector. Journal of Emerging Management Studies, 1(2), 171–184. https://doi.org/10.3126/jems.v1i2.71524	Additional article	Quantitative study	MMAT 2018	Yes	5/5 (100%)	2/5 (40%)	Low	★★★★ (High)	Yes
FUENTESFUENTES_2023	del Mar Fuentes-Fuentes, M., Quintana-García, C., Marchante-Lara, M., & Benavides-Chicón, C. G. (2023). Gender diversity, inclusive innovation and firm performance. Sustainable Development, 31(5), 3622–3638. https://doi.org/10.1002/sd.2615	Additional article	Quantitative study	MMAT 2018	Yes	5/5 (100%)	4/5 (80%)	Low	★★★★ (High)	Yes
CORONADOMALDONADO_2023	Coronado-Maldonado I, Benítez-Márquez MD. Emotional intelligence, leadership, and work teams: A hybrid literature review. Heliyon. 2023 Sep 20;9(10):e20356. doi: 10.1016/j.heliyon.2023.e20356. PMID: 37790975; PMCID: PMC10543214.	Additional article	Systematic review	AMSTAR 2	Yes	5/7 (71%)	11/14 (79%)	Moderate	★★★ (Moderate)	Yes
XIAO_2023	Xiao, H. (2023). The role of emotional intelligence in leadership and team dynamics. International Journal for Multidisciplinary Research, https://www.ijfmr.com/papers/2023/6/8140.pdf	Additional article	Quantitative study	MMAT 2018	Yes	4/5 (80%)	4/5 (80%)	Low	★★★★ (High)	Yes
KOUTSIOUMPA_2023	Koutsioumpa, E. M. (2023). Contribution of Emotional Intelligence to Efficient Leadership. A Narrative Review. Technium Social Sciences Journal, 48(1), 204–216. https://doi.org/10.47577/tssj.v48i1.9529	Additional article	Systematic review	AMSTAR 2	Yes	6/7 (86%)	11/14 (79%)	Low	★★★★ (High)	Yes
PATERIYA_2023	Pateriya, Srijan & Prasad, Sumit. (2023). Emotional Landscape of Leadership: Exploring the Mediating Effects of Leadership Styles on Organizational Performance. 12. 2217-2224. 10.6084/m9.figshare.23261645.	Additional article	Quantitative study	MMAT 2018	Yes	4/5 (80%)	2/5 (40%)	Low	★★★★ (High)	Yes
HEMMERT_2022	Martin Hemmert & Cecile K. Cho & Ji Young Lee, 2022. "Enhancing innovation through gender diversity: a two-country study of top management teams," European Journal of Innovation Management, Emerald Group Publishing Limited, vol. 27(1), pages 193-213, June. DOI: 10.1108/ejim-08-2021-0383	Additional article	Quantitative study	MMAT 2018	Yes	4/5 (80%)	3/5 (60%)	Low	★★★★ (High)	Yes
TONOYAN_2022	Vartuhi Tonoyan, Aleksandra Joanna Kacperczyk, Jennifer E Jennings, Jennifer Randles, Alice H Eagly, Vishal K. Gupta, Eden King, Robert Strohmeyer, and Peter Younkin, 2022: Gender Stereotypes about Leadership and Entrepreneurship: Taking Stock and Looking Ahead. Proceedings, 2022, https://doi.org/10.5465/AMBPP.2022.18086symposium	Additional article	Quantitative study	MMAT 2018	Yes	4/5 (80%)	2/5 (40%)	Low	★★★★ (High)	Yes
TSARUK_2022	Oleksandr Tsaruk, 2022: Entrepreneurs Are From Mars, Venture Capitalists Are From Venus: Gender Biases in Decision-Making. Proceedings, 2022, https://doi.org/10.5465/AMBPP.2022.13516abstract	Additional article	Quantitative study	MMAT 2018	Yes	3/5 (60%)	4/5 (80%)	Moderate	★★★ (Moderate)	Yes
DREYER_2022	Dreyer, D. (2022). Risky decision making under stressful conditions: Men and women with smaller cortisol elevations make riskier social and economic decisions.Frontiers in PsychologyDOI=10.3389/fpsyg.2022.810031	Additional article	Quantitative study	MMAT 2018	Yes	3/5 (60%)	5/5 (100%)	Moderate	★★★ (Moderate)	Yes
POOJA_2022	Pooja, B. (2022). Emotional intelligence amongst millennials: Male vs. female leaders in the IT and ITES sectors. International Journal of Human Capital and Information Technology Professionals, 13(1), 1-18. https://doi.org/10.4018/ijhcitp.300316	Additional article	Quantitative study	MMAT 2018	Yes	3/5 (60%)	5/5 (100%)	Moderate	★★★ (Moderate)	Yes
MISHRA_2022	Mishra, Deepanjali. (2022). An Analysis of the Role of Emotional Intelligence in Corporate Leadership. ECS Transactions. 107. 14959-14973. 10.1149/10701.14959ecst.	Additional article	Quantitative study	MMAT 2018	Yes	3/5 (60%)	5/5 (100%)	Moderate	★★★ (Moderate)	Yes
SEBRE_2021	Sebre, Sandra & Stokenberga, Ieva & Saitere, Sanita. (2021). Empathy, Humor and Other Emotional Skills in Leadership. 10.1007/978-3-030-60060-0_6.	Additional article	Quantitative study	MMAT 2018	Yes	4/5 (80%)	4/5 (80%)	Low	★★★★ (High)	Yes
SOLOMON_2020	Solomon, I.G. (2020). The Influence of Leadership Based on Emotional Intelligence Concerning the Climate of an Organisation. International Journal of Management Science and Business Administration, 6(5), 38-43. DOI: 10.18775/ijmsba.1849-5664-5419.2014.65.1005	Additional article	Quantitative study	MMAT 2018	Yes	5/5 (100%)	5/5 (100%)	Low	★★★★ (High)	Yes
HAN_2019	Han, S., Cui, W., Chen, J., & Fu, Y. (2019). Female CEOs and Corporate Innovation Behaviors—Research on the Regulating Effect of Gender Culture. Sustainability, 11(3), 682. https://doi.org/10.3390/su11030682	Additional article	Quantitative study	MMAT 2018	Yes	4/5 (80%)	4/5 (80%)	Low	★★★★ (High)	Yes
CASTILLO_2019	OCAMPO CASTILLO, M. D. S. (2019). Women, Business and Leadership Gender and Organizations. Multidisciplinary Journal of Gender Studies, 8(2), 204–205. https://doi.org/10.17583/generos.2019.4402	Additional article	Quantitative study	MMAT 2018	Yes	3/5 (60%)	4/5 (80%)	Moderate	★★★ (Moderate)	Yes
BAESU_2018	BAESU, C. (2018). Leadership Based On Emotional Intelligence In Modern Organizations," The USV Annals of Economics and Public Administration, Stefan cel Mare University of Suceava, Romania, Faculty of Economics and Public Administration, vol. 18(2(28)), pages 73-78, December. https://ideas.repec.org/a/scm/usvaep/v18y2018i2(28)p73-78.html	Additional article	Quantitative study	MMAT 2018	Yes	3/5 (60%)	5/5 (100%)	Moderate	★★★ (Moderate)	Yes
GALLEGO_2018	Gallego, J. M., & Gutiérrez, L. H. (2018). An Integrated Analysis of the Impact of Gender Diversity on Innovation and Productivity in Manufacturing Firms. https://doi.org/10.18235/0000987	Additional article	Quantitative study	MMAT 2018	Yes	4/5 (80%)	4/5 (80%)	Low	★★★★ (High)	Yes
BUEHRING_2018	Buhring, Jorn & Moore, Patricia. (2018). Emotional and Social Intelligence as ‘Magic Key’ in Innovation: A Designer’s call toward inclusivity for a. Journal of Innovation Management. 6. 10.24840/2183-0606_006.002_0002.	Additional article	Quantitative study	MMAT 2018	Yes	4/5 (80%)	3/5 (60%)	Low	★★★★ (High)	Yes
HORBACH_2018	Horbach J, Jacob J. The relevance of personal characteristics and gender diversity for (eco-)innovation activities at the firm-level: Results from a linked employer–employee database in Germany. Bus Strat Env. 2018; 27: 924–934. https://doi.org/10.1002/bse.2042	Additional article	Quantitative study	MMAT 2018	Yes	4/5 (80%)	2/5 (40%)	Low	★★★★ (High)	Yes
BATAEVA_2018	Bella Bataeva & Alla Vavilina, 2018. "Emotional Leadership in Organizations: Theoretical and Applied Aspects," Springer Proceedings in Business and Economics, in: Wadim Strielkowski & Oksana Chigisheva (ed.), Leadership for the Future Sustainable Development of Business and Education, pages 49-58, Springer. DOI: 10.1007/978-3-319-74216-8_6	Additional article	Conceptual / Theoretical	N/A	Yes	N/A	N/A			No (Theory)
VYAS_2017	Vyas, M. (2017). Role of Emotional Intelligence in Leadership Effectiveness. International Journal of Engineering and Management Research, 7, 115-119.	Additional article	Quantitative study	MMAT 2018	Yes	5/5 (100%)	4/5 (80%)	Low	★★★★ (High)	Yes
PANAIT_2017	Panait, C. (2017). Emotional Intelligence in Leadership. SCIENTIFIC RESEARCH AND EDUCATION IN THE AIR FORCE.	Additional article	Quantitative study	MMAT 2018	Yes	4/5 (80%)	4/5 (80%)	Low	★★★★ (High)	Yes
WALLACE_2005	Wallace, E & Rijamampianina, Rasoava. (2005). Strategic Decision Making with Corporate Emotional Intelligence. Problems and Perspectives in Management. 3.	Additional article	Quantitative study	MMAT 2018	Yes	4/5 (80%)	2/5 (40%)	Low	★★★★ (High)	Yes
BRESCOLL_2016	Brescoll, V. L. (2016). Leading with their hearts ? How gender stereotypes of emotion lead to , Volume 27, Issue 3, Pages 415-428, ISSN 1048-9843, https://doi.org/10.1016/j.leaqua.2016.02.005.	Additional article	Quantitative study	MMAT 2018	Yes	5/5 (100%)	4/5 (80%)	Low	★★★★ (High)	Yes
THEBAUD_2015	Thébaud, S., Cha, S., Correll, M., Desoucey, J., Glass, D., Pedulla, M., Ruef, R., Swedberg, C., Taylor, J., Todd, K., & Weeden. (2015). Status Beliefs and the Spirit of Capitalism: Accounting for Gender Biases in Entrepreneurship and Innovation and a Dissertation Fellowship from the Ewing Marion Kauffman Foundation. I Thank Youngjoo.	Additional article	Quantitative study	MMAT 2018	Yes	4/5 (80%)	5/5 (100%)	Low	★★★★ (High)	Yes
BAESU_2015	Băeșu, C., & Bejinaru, R. (2015). Innovative leadership styles and the influence of emotional intelligence. USV Annals of Economics and Public Administration, 15(3), 136–145. http://annals.seap.usv.ro/index.php/annals/article/view/814/733	Additional article	Quantitative study	MMAT 2018	Yes	3/5 (60%)	2/5 (40%)	Moderate	★★★ (Moderate)	Yes
BRESCOLL_2015	Brescoll, Victoria. (2015). How Gender Stereotypes of Emotion Harm Women Leaders. 10.1007/978-3-658-09469-0_11.	Additional article	Quantitative study	MMAT 2018	Yes	3/5 (60%)	4/5 (80%)	Moderate	★★★ (Moderate)	Yes
Caldarola_2014	Caldarola, R.A. (2014). The Intersection of Emotional Intelligence and Corporate Financial Decision Making. Journal of Corporate Accounting & Finance, 25, 67-72.	Additional article	Quantitative study	MMAT 2018	Yes	4/5 (80%)	5/5 (100%)	Low	★★★★ (High)	Yes
Gardner_2002	Gardner, L., & Stough, C. (2002). Examining the relationship between leadership and emotional intelligence in senior level managers. Leadership & Organization Development Journal, 23, 68-79.	Additional article	Quantitative study	MMAT 2018	Yes	5/5 (100%)	5/5 (100%)	Low	★★★★ (High)	Yes
HESS_2011	Hess, J.D. and Bacigalupo, A.C. (2011), "Enhancing decisions and decision‐making processes through the application of emotional intelligence skills", Management Decision, Vol. 49 No. 5, pp. 710-721. https://doi.org/10.1108/00251741111130805	Additional article	Quantitative study	MMAT 2018	Yes	4/5 (80%)	3/5 (60%)	Low	★★★★ (High)	Yes
SUCIU_2010	Suciu, S., Gherheş, V., & Petcu, D. (2010). Emotional intelligence and leadership. Anale. Seria Ştiinţe Economice. Timişoara, 16, 549–555.	Additional article	Quantitative study	MMAT 2018	Yes	4/5 (80%)	4/5 (80%)	Low	★★★★ (High)	Yes
BURKE_2005	Burke, L. A., & Miller, M. K. (2005). Examining gender differences in intuitive decision making in the workplace: An exploratory investigation. Gender and Behaviour, 3(1), 252–268. https://doi.org/10.4314/gab.v3i1.23324	Additional article	Quantitative study	MMAT 2018	Yes	5/5 (100%)	2/5 (40%)	Low	★★★★ (High)	Yes
BEKE_2024	Beke, É. (2024). The role of emotional intelligence in effective leadership. Journal of Economic Research, 3( 3 ). https://doi.org/10.47833/2024.3.eco.006	Additional article	Quantitative study	MMAT 2018	Yes	5/5 (100 %)	5/5 (100 %)	Low	★★★★ (High)	Yes
ARIVUMANI_2024	Arivumani, P. D. (2024). Emotional intelligence and leadership effectiveness in MSMEs. Journal of Social Sciences, 3( 10 ). https://doi.org/10.57185/joss.v3i10.372	Additional article	Quantitative study	MMAT 2018	Yes	4/5 (80 %)	4/5 (80 %)	Moderate	★★★ (Moderate)	Yes
STEVEN_2024	Steven, S., & Hanggraeni, D. (2024). Emotional intelligence and leadership style influence on employee performance. Eduvest, 4( 10 ). https://doi.org/10.59188/eduvest.v4i10.34664	Additional article	Quantitative study	MMAT 2018	Yes	5/5 (100 %)	4/5 (80 %)	Low	★★★★ (High)	Yes
HU_2024	Hu, Y., & Hou, L. (2024). Female leaders’ intuitive decision-making and firm innovation performance. Proceedings of Business and Economic Studies, 7( 6 ). https://doi.org/10.26689/pbes.v7i6.9121	Additional article	Quantitative study	MMAT 2018	Yes	4/5 (80 %)	3/5 (60 %)	Moderate	★★★ (Moderate)	Yes
SILVA_2024	Horta Reis da Silva, T., Hammett, R., & Low, G. (2024). Cultivating emotionally intelligent leadership: A data-analytics approach. In Advances in Business Information Systems and Analytics. https://doi.org/10.4018/979-8-3693-6447-5.ch006	Additional article	Quantitative study	MMAT 2018	Yes	5/5 (100 %)	5/5 (100 %)	Low	★★★★ (High)	Yes
